# Supplementary material for: Analysing the effect of the crystal structure on upconversion luminescence in Yb3+,Er3+-co-doped NaYF4 nanomaterials
Source: Royal Society of Chemistry journal article supplement (doi:10.1039/c5tc02218e), 2015-01-01
Supplement: c5tc02218e1.pdf [file c5tc02218e1.pdf]

## Supporting Information:

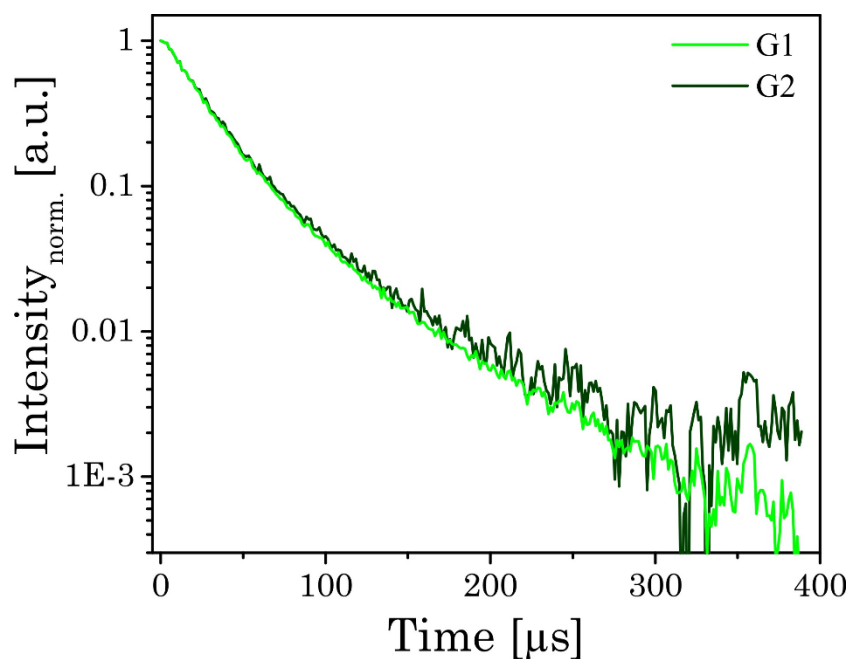

SI.Fig.1: Normalized upconversion luminescence decay kinetics of the  $\text{Er}^{3+}$  emission bands G1 and G2 of  $\text{UCNP}_{400}$ .

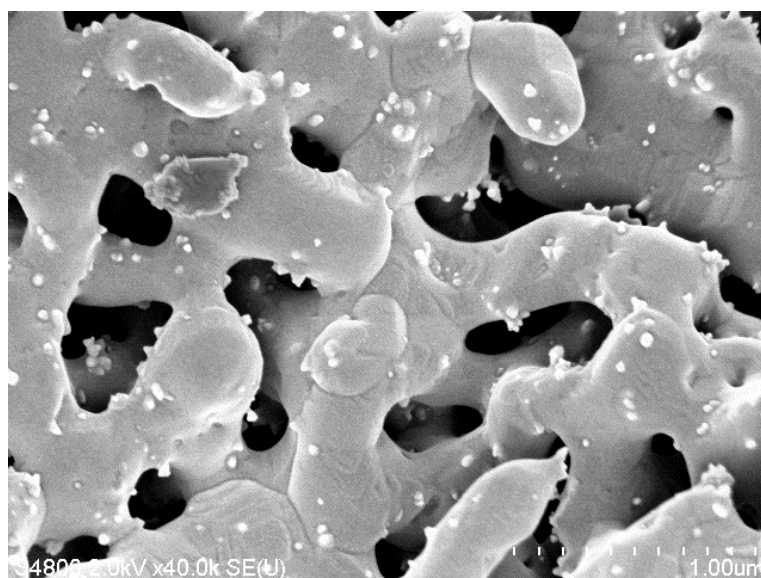

Fig.SI-2: SEM-image of annealed  $\text{UCNP}_{400}$  with micro domains, which is representative for all  $\text{UCNP}_x$  with  $x > 400^\circ\text{C}$ .

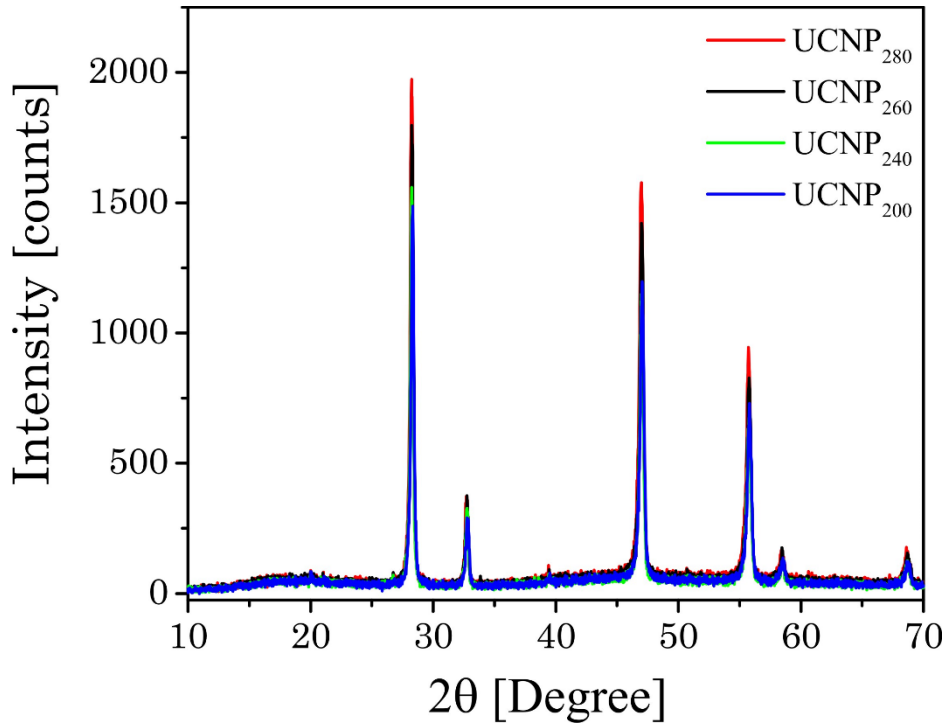

Fig. SI-3: X-ray diffraction patterns of UCNP<sub>x</sub> after annealing between 200°C < T<sub>an</sub> < 280°C for 5h.

SI-Tab.2: Crystallite size of UCNP<sub>x</sub> nanoparticles after different thermal treatment calculated with Debye-Scherrer from typical α-phase XRD pattern.

| UCNP <sub>x</sub>    | Millersche Indices    |      |      |      |
|----------------------|-----------------------|------|------|------|
|                      | 111                   | 200  | 220  | 311  |
| T <sub>an</sub> [°C] | Crystallite size [nm] |      |      |      |
| 200                  | 36.8                  | 38.2 | 27.7 | 26.2 |
| 220                  | 38.7                  | 39.7 | 28.9 | 26.1 |
| 240                  | 38.9                  | 43.1 | 29.0 | 26.3 |
| 280                  | 39.6                  | 39.9 | 28.6 | 25.8 |
| 300                  | 39.6                  | 39.6 | 29.2 | 25.5 |
| 700                  | 47.7                  | 48.6 | 34.1 | 25.2 |

SI-Tab.3: Crystallite size of UCNP<sub>x</sub> nanoparticles after different thermal treatment calculated with Debye-Scherrer from typical β-phase XRD pattern.

| UCNP <sub>x</sub>    | Millersche Indices    |      |      |      |      |
|----------------------|-----------------------|------|------|------|------|
|                      | 100                   | 110  | 101  | 201  | 300  |
| T <sub>an</sub> [°C] | Crystallite size [nm] |      |      |      |      |
| 400                  | 64.4                  | 59.8 | 58.2 | 46.4 | 41.3 |
| 500                  | 95.1                  | 75.4 | 73.6 | 58.1 | 53.4 |
| 600                  | 105.3                 | 78.7 | 69.6 | 53.6 | 53.0 |

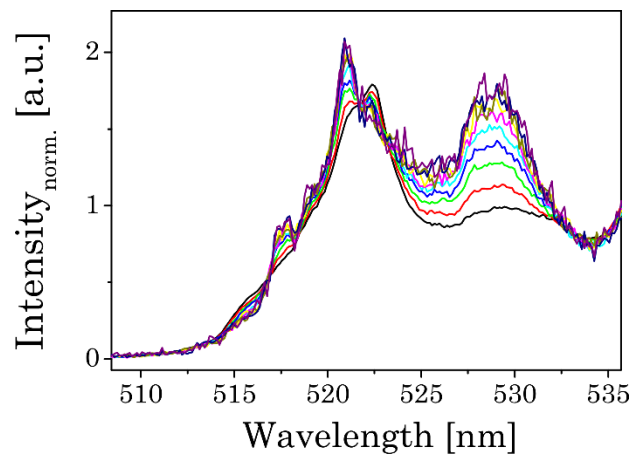

*Fig. SI-4: Enlarged representation in G1-related TRANES for UCNP<sub>300</sub> showing the isoemissive points in detail.*
